# Supplementary material
Source: HighWire-hosted journal article supplement (https://jnm.snmjournals.org/highwire/filestream/104686/field_highwire_adjunct_files/0/262290_Supplemental_Data.pdf)
Supplement: 262290_Supplemental_Data.pdf [file 262290_Supplemental_Data.pdf]

**Supplemental Table 1**

| Patient No. | Contrast-to-noise ratio (CNR) in the lesions interpreted as PSMA-positive with <sup>89</sup> Zr-PSMA-Df in PET-2 |                          |                           |                           |                           | Corresponding area with <sup>18</sup> F-JK-PSMA-7 in PET-1 | Corresponding area with <sup>68</sup> Ga-PSMA-11 in PET-1 |
|-------------|------------------------------------------------------------------------------------------------------------------|--------------------------|---------------------------|---------------------------|---------------------------|------------------------------------------------------------|-----------------------------------------------------------|
|             | PET finding                                                                                                      | d 1                      | d 2                       | d 3                       | d 6                       | 2 h                                                        | 1 h                                                       |
| 1           | Prostate lobe right, CNR<br>SUV <sub>mean</sub> lesion-SUV <sub>mean</sub> bckg):SD bckg                         |                          | 3.78<br>(7.25-1.13):1.62  | 2.98<br>(7.51-2.03):1.84  |                           | 0.94<br>(3.30-2.24):1.13                                   |                                                           |
|             | Prostate lobe left<br>SUV <sub>mean</sub> lesion-SUV <sub>mean</sub> bckg):SD bckg                               |                          | 3.48<br>(6.77-1.13):1.62  | 1.14<br>(4.12-2.03):1.84  |                           | 0.59<br>(2.91-2.24):1.13                                   |                                                           |
| 2           | Lung left (dignity unclear), CNR<br>SUV <sub>mean</sub> lesion-SUV <sub>mean</sub> bckg):SD bckg                 |                          | 20.33<br>(3.81-0.15):0.18 |                           | 23.74<br>(4.62-0.11):0.19 |                                                            | 12.13<br>(2.42-0.48):0.16                                 |
| 3           | I.n. retroperitoneal<br>SUV <sub>mean</sub> lesion-SUV <sub>mean</sub> bckg):SD bckg                             |                          | 1.12<br>(2.14-0.85):1.15  | 3.09<br>(4.06-0.66):1.10  |                           | 0.09<br>(1.16-1.10):0.68                                   |                                                           |
|             | I.n. retroperitoneal<br>SUV <sub>mean</sub> lesion-SUV <sub>mean</sub> bckg):SD bckg                             |                          | 8.31<br>(10.41-0.85):1.15 | 6.56<br>(7.88-0.66):1.10  |                           | 1.01<br>(1.79-1.10):0.68                                   |                                                           |
|             | I.n. retroperitoneal<br>SUV <sub>mean</sub> lesion-SUV <sub>mean</sub> bckg):SD bckg                             |                          | 8.63<br>(10.78-0.85):1.15 | 4.71<br>(5.84-0.66):1.10  |                           | -0.16<br>(0.99-1.10):0.68                                  |                                                           |
|             | I.n. supraclav. Left<br>SUV <sub>mean</sub> lesion-SUV <sub>mean</sub> bckg):SD bckg                             |                          | 18.78<br>(7.01-0.25):0.36 | 11.91<br>(5.47-0.35):0.43 |                           | 2.85<br>(1.51-0.57):0.33                                   |                                                           |
|             | I.n. iliac right<br>SUV <sub>mean</sub> lesion-SUV <sub>mean</sub> bckg):SD bckg                                 |                          | 11.51<br>(4.64-0.38):0.37 | 20.58<br>(10.72-0.43):0.5 |                           |                                                            | 3.02<br>(2.64-0.80):0.61                                  |
| 6           | Os ilium left<br>SUV <sub>mean</sub> lesion-SUV <sub>mean</sub> bckg):SD bckg                                    |                          | 17.67<br>(9.88-0.34):0.54 | 37.90<br>(11.61-0.24):0.3 |                           |                                                            | 9.41<br>(4.87-0.54):0.46                                  |
|             | I.n. retroperitoneal<br>SUV <sub>mean</sub> lesion-SUV <sub>mean</sub> bckg):SD bckg                             | 4.55<br>(6.13-1.35):1.05 | 4.92<br>(6.87-1.26):1.14  |                           | 12.15<br>(9.52-0.71):0.75 |                                                            | 0.03<br>(1.75-1.71):1.16                                  |
| 8           | I.n. retroperitoneal<br>SUV <sub>mean</sub> lesion-SUV <sub>mean</sub> bckg):SD bckg                             | 3.89<br>(5.43-1.35):1.05 | 6.46<br>(8.63-1.26):1.14  |                           | 5.51<br>(4.84-0.71):0.75  |                                                            | 1.69<br>(3.67-1.71):1.16                                  |
|             | I.n. supraclav. Left<br>SUV <sub>mean</sub> lesion-SUV <sub>mean</sub> bckg):SD bckg                             | 2.98<br>(2.49-0.79):0.57 | 3.08<br>(1.71-0.54):0.38  |                           | 12.98<br>(6.43-0.46):0.46 |                                                            | 0.65<br>(1.78-1.41):0.57                                  |
|             | Prostate fossa right<br>SUV <sub>mean</sub> lesion-SUV <sub>mean</sub> bckg):SD bckg                             |                          | 3.46<br>(10.50-1.91):2.48 | 13.22<br>(15.25-1.1):1.07 | 8.35<br>(7.11-0.51):0.79  | -0.19<br>(7.43-                                            |                                                           |

|    |                                                                                     |  |                            |                            |  |                                |                          |
|----|-------------------------------------------------------------------------------------|--|----------------------------|----------------------------|--|--------------------------------|--------------------------|
|    |                                                                                     |  |                            |                            |  | 11.56):21.4                    |                          |
| 13 | I.n. iliac right<br>SUV <sub>mean</sub> lesion-SUV <sub>mean</sub> bckg):SD bckg    |  | 12.91<br>(5.89-0.21):0.44  | 8.03<br>(3.33-0.20):0.39   |  |                                | 4.25<br>(3.46-0.78):0.63 |
| 14 | Prostate fossa left<br>SUV <sub>mean</sub> lesion-SUV <sub>mean</sub> bckg):SD bckg |  | 30.83<br>(17.31-0.66):0.54 | 16.67<br>(11.35-0.68):0.64 |  | -0.26<br>(6.53-<br>11.5):18.96 |                          |

**Supplemental Table 1.** Contrast-to-noise ratio of 15 lesions in 8 patients whose <sup>89</sup>Zr-PSMA-Df PET scans (PET-2) were interpreted as PSMA-positive. When one or several PSMA-positive areas were detected by <sup>89</sup>Zr-PSMA-Df PET, the SUV<sub>mean</sub> within the corresponding area of the <sup>18</sup>F-JK-PSMA-7 or the <sup>68</sup>Ga-PSMA-11 PET was measured. The contrast-to-noise ratio (CNR) was calculated as the ratio of the difference of the SUV<sub>mean</sub> in the lesion and the SUV<sub>mean</sub> in the background to standard deviation in the background. The SUV<sub>mean</sub> of the background and its standard deviation were measured in a 3 cm VOI in the local background around the lesion. The CNR of <sup>89</sup>Zr-PSMA-Df PET-2 (first measurement) was significantly higher than the CNR of the PET-1 scan with <sup>68</sup>Ga-PSMA-11 (p=0.0016, paired t-test) or <sup>18</sup>F-JK-PSMA-7 (p=0.036).

*Abbreviations:* CNR, contrast-to-noise ratio; bckg, background; d, day; h, hour; I.n., lymph node; SUV, standardized uptake value; VOI, volume of interest

## Supplemental Figure 1

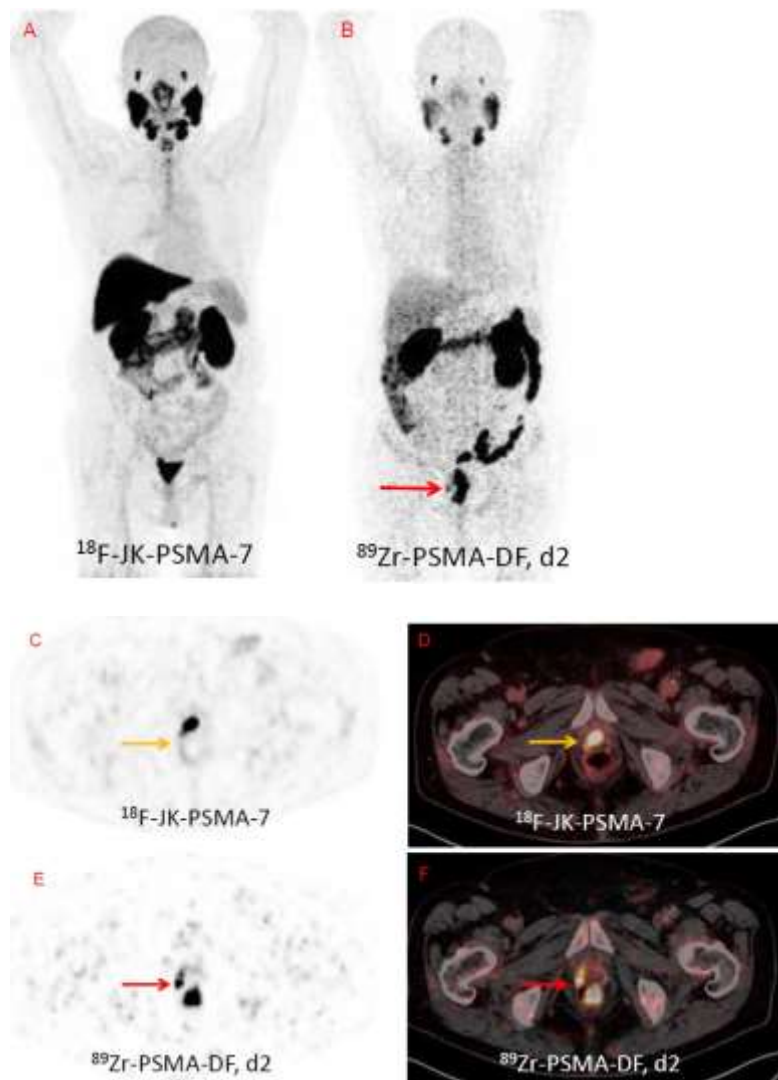

**Supplemental FIGURE 1.**  $^{18}\text{F}$ -JK-PSMA-7 PET with MIP (A), attenuation corrected PET scan (C), PET/low-dose CT fusion image (D) and  $^{89}\text{Zr}$ -PSMA-Df PET 2 days p.i. with MIP (B), attenuation corrected PET scan (E), PET/low-dose CT fusion image (F) of patient No. 10 with BCR after prostatectomy. Standard field salvage radiotherapy had been refused by the patient before the  $^{89}\text{Zr}$ -PSMA-Df PET scan. The PSMA-positive relapse in the right prostate fossa is clearly visible with  $^{89}\text{Zr}$ -PSMA-Df without the overlay of the residual activity in the urine (red arrows in B, E, F). Residual activity of  $^{89}\text{Zr}$ -PSMA-Df is seen in the rectum. The  $^{18}\text{F}$ -JK-PSMA-7 PET was misinterpreted as activity in the ureter, but the relapse is retrospectively also PSMA-positive with  $^{18}\text{F}$ -JK-PSMA-7 (yellow arrow in C, D). Based on the findings of the  $^{89}\text{Zr}$ -PSMA-Df PET scan, the patient underwent salvage-radiotherapy, and the PSA level dropped from 0.54 ng/ml to 0.3 ng/ml.

Abbreviations: d, day; MIP, maximum intensity projection; p.i.; post injection
